# Supplementary material
Source: Springer Nature journal article supplement (https://www.springermedizin.de/resource/supplementary/12889_2013_5739_MOESM2_ESM.pdf/9496104)

**partially non treatment  
seeking patients**

**primarily treatment  
seeking patients**

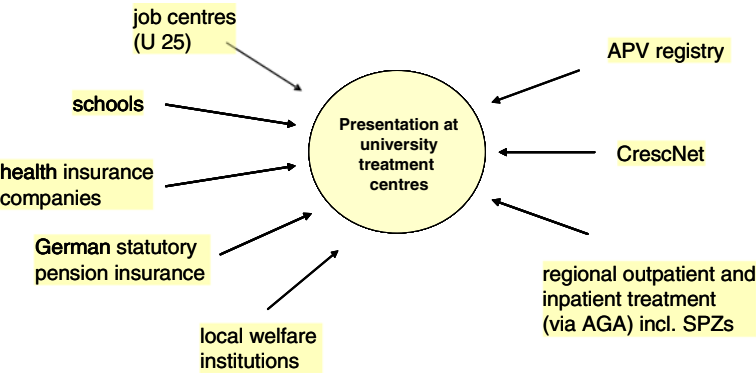

Supplement: MOESM2 [file 9496104]
